# Supplementary material
Source: PubMed Central journal article supplement (PMC2757843)
Supplement: 0903775106_0903775106SI.pdf [file 0903775106_0903775106SI.pdf]

# Supporting Information

Iwawaki et al. 10.1073/pnas.0903775106

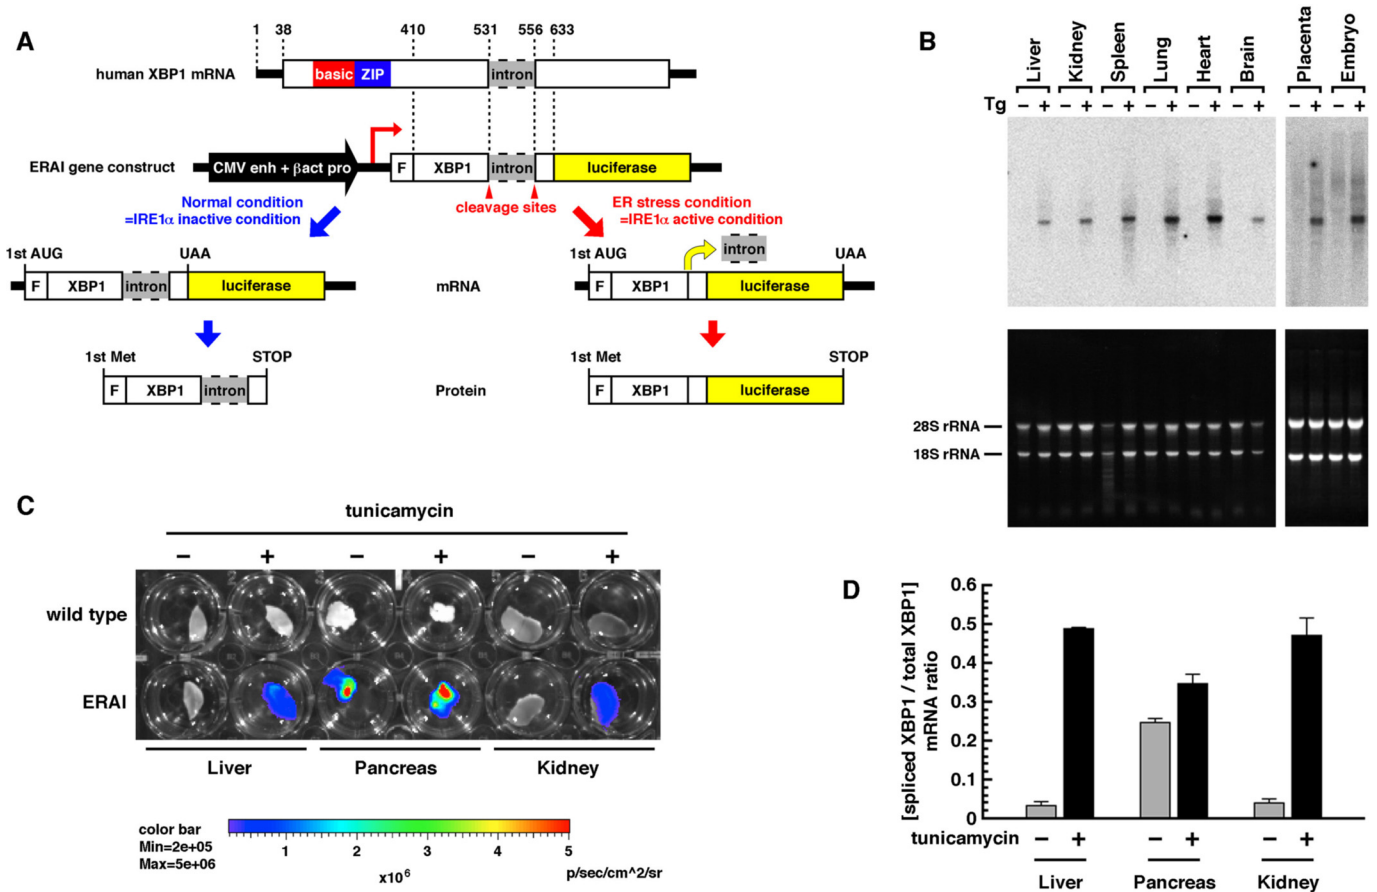

**Fig. S1.** Characterization of ERAI-LUC mice. (A) Schematic diagram of the ERAI-LUC system. The ERAI gene construct includes one part of the human XBP1 cDNA (410–633 nt). Basic (red) and ZIP (blue) indicate the coding regions of the basic and leucine zipper domains, respectively, in human XBP1 mRNA. The transcripts from the ERAI-LUC construct were not spliced under IRE1 $\alpha$ -inactive conditions. The unspliced mRNA was translated into a truncated XBP1 protein with a FLAG tag at its amino terminus. Under IRE1 $\alpha$ -active conditions, these transcripts were spliced, leading to a frame shift. The spliced mRNA was translated into an XBP1-luciferase fusion protein with a FLAG tag at its amino terminus. Thus, we detected luminescence only in IRE1 $\alpha$ -active cells. (B) Northern blot analysis of ERAI-LUC transgene in embryos (E12.5), placentas (E12.5), and various tissues from adult wild-type and ERAI-LUC mice. Tg<sup>-</sup> and Tg<sup>+</sup> indicate wild type and transgenic, respectively. Ethidium bromide staining (*Bottom*) shows the RNA loading control. (C) Bioluminescence imaging of liver, pancreas, and kidney tissues from adult wild-type and ERAI-LUC mice. The photo is a visible light image superimposed on an optical CCD bioluminescence image with a scale of photons per second per square centimeter per steradian (sr). Tunicamycin<sup>+</sup> indicates i.p. injection with tunicamycin (500 ng/g body weight) 16 h before tissue collection. (D) Quantitative PCR analysis of endogenous XBP1 in liver, pancreas, and kidney tissues of ERAI-LUC mice. Each sample is derived from tissues observed in C. Error bar indicates SEM ( $n = 3$ ). From these data, we could confirm that the transgene was ubiquitously expressed in ERAI-LUC mice, the tissues of which emitted luminescence signals corresponding to the ER stress. This indicates that similar to the ERAI-GFP mouse, the ERAI-LUC mouse is a useful model for monitoring ER stress and IRE1 $\alpha$  activity in vivo.



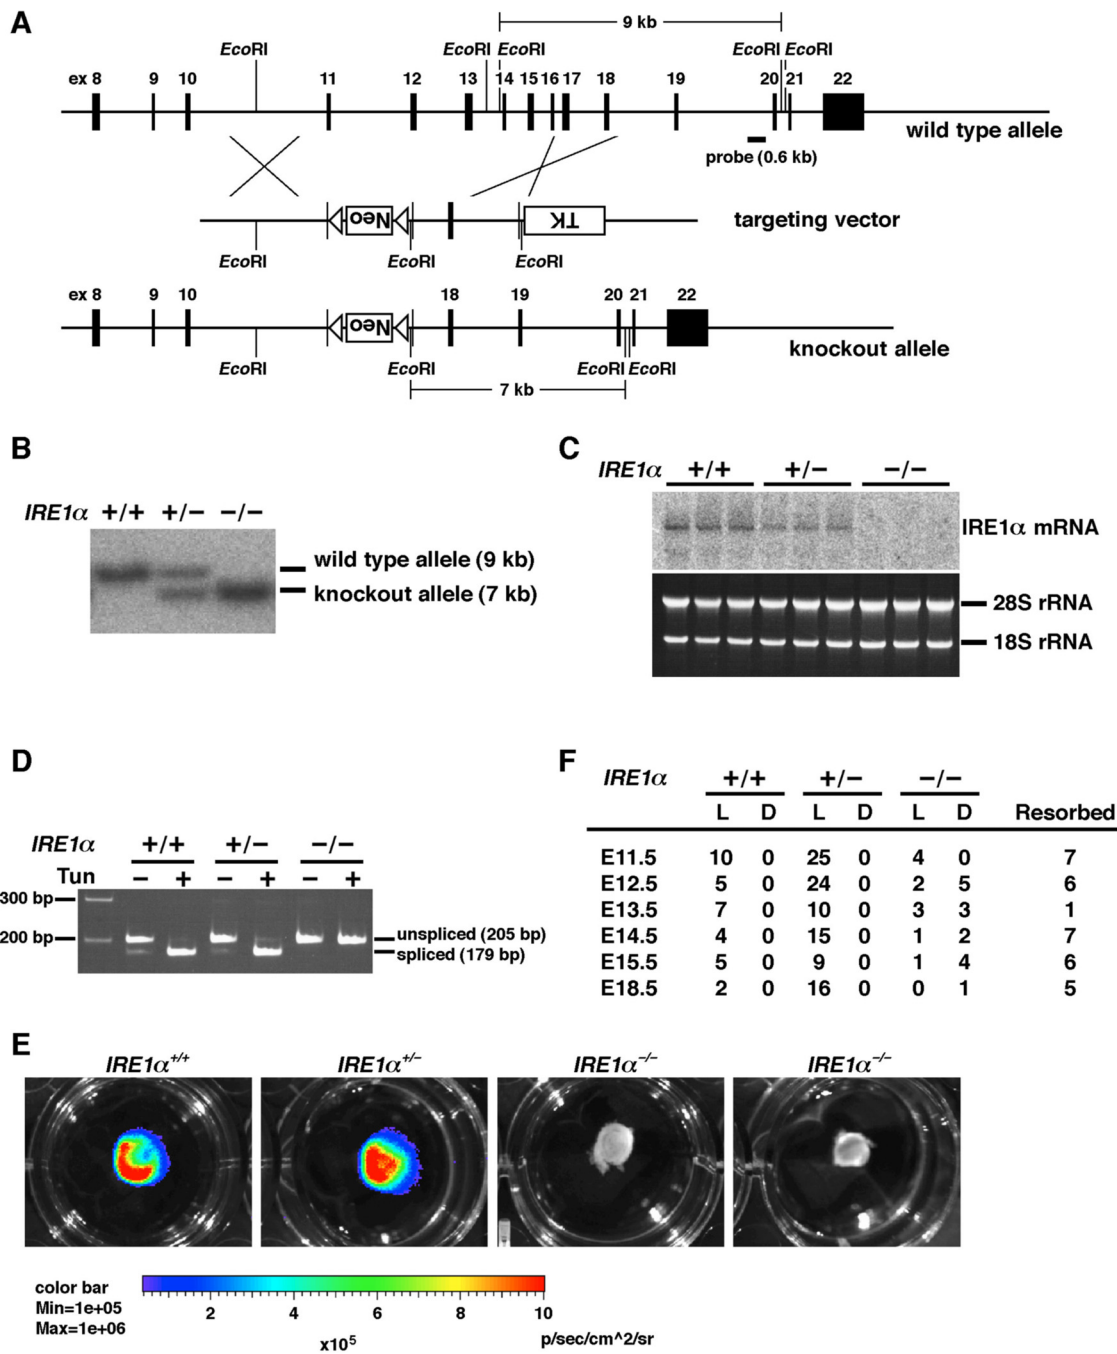

**Fig. S3.** Basic characterization of *IRE1α* conventional knockout mice. (A) Schematic diagram showing the predicted recombination of the targeting vector and the mouse *IRE1α* locus. Neo and TK indicate expression units of the neomycin resistance gene and thymidine kinase gene for positive and negative selections, respectively. (B) Southern blot analysis of offspring obtained from mating *IRE1α*<sup>+/-</sup> mice. (C) Northern blot analysis of *IRE1α* in *IRE1α*<sup>+/+</sup>, *IRE1α*<sup>+/-</sup>, and *IRE1α*<sup>-/-</sup> MEFs. Ethidium bromide staining (Bottom) shows the RNA loading control. (D) RT-PCR analysis of *XBP1* in *IRE1α*<sup>+/+</sup>, *IRE1α*<sup>+/-</sup>, and *IRE1α*<sup>-/-</sup> MEFs. +Tun and -Tun indicate treatment with and without 2 μg/mL tunicamycin for 6 h, respectively. (E) Bioluminescence imaging of the placentas of littermates obtained from mating a female *ERAI-LUC*<sup>-/-</sup>; *IRE1α*<sup>+/-</sup> mouse and a male *ERAI-LUC*<sup>+/+</sup>; *IRE1α*<sup>+/-</sup> mouse. The photos are a visible light image superimposed on an optical CCD bioluminescence image with a scale of photons per second per square centimeter per steradian (sr). (F) Number of embryos obtained from mating *IRE1α*<sup>+/-</sup> mice. L, live embryos; D, dead embryos. The viability of embryos was judged from their beating heart. From these data, we confirmed that exons 11–17 were deleted in the *IRE1α* knockout allele, that *XBP1* splicing activity was lost in our *IRE1α*<sup>-/-</sup> mouse embryos similarly to the result in the previously reported *IRE1α* KO mouse, and that the embryos began to die at E12.5. We, however, used live embryos for examining *IRE1α*<sup>-/-</sup> mouse phenotypes at all analyzed stages to maximally exclude secondary effects due to the loss of *IRE1α*.



*IRE1α<sup>+/+</sup>*

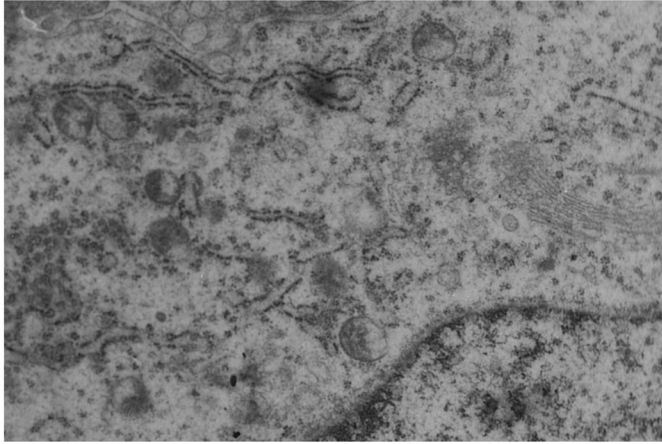

*IRE1α<sup>-/-</sup>*

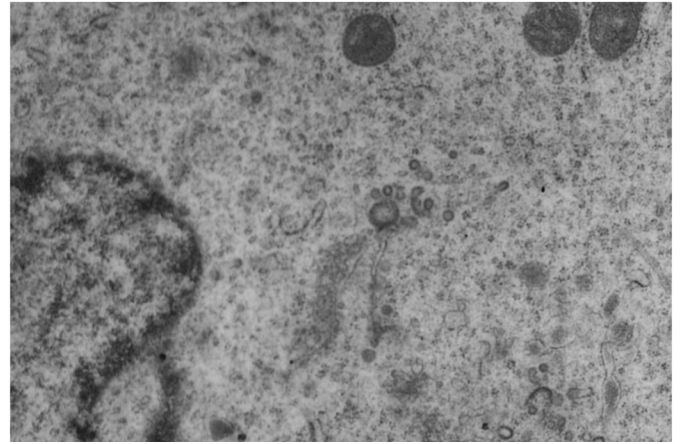

Fig. S5. Fig. 2G is enlarged for the presentation of fine subcellular structures.



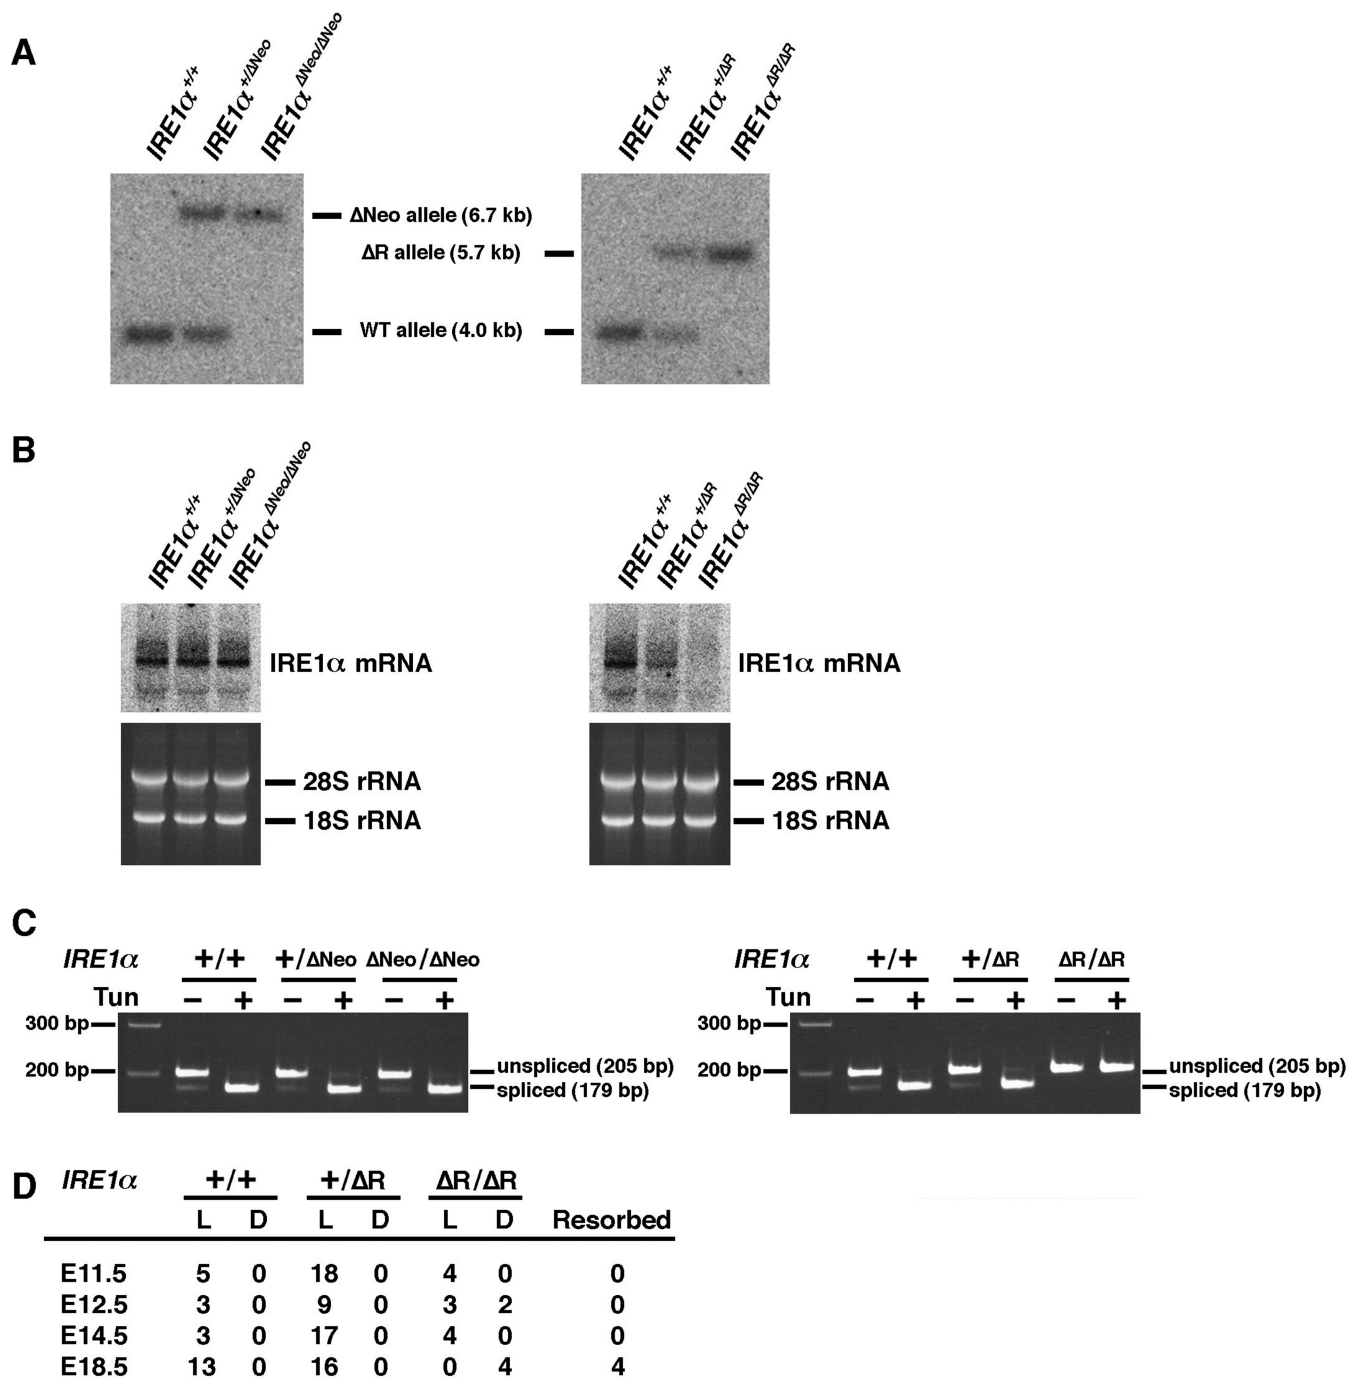

**Fig. S6.** Basic characterization of *IRE1α* conditional knockout mice. (A) Southern blot analysis of offspring obtained from mating *IRE1α*<sup>+/ $\Delta$ Neo</sup> mice and from mating *IRE1α*<sup>+/ $\Delta$ R</sup> mice. (B) Northern blot analysis of *IRE1α* in *IRE1α*<sup>+/+</sup>, *IRE1α*<sup>+/ $\Delta$ Neo</sup>, *IRE1α* <sup>$\Delta$ Neo/ $\Delta$ Neo</sup>, *IRE1α*<sup>+/ $\Delta$ R</sup>, and *IRE1α* <sup>$\Delta$ R/ $\Delta$ R</sup> MEFs. Ethidium bromide staining (Bottom) shows the RNA loading control. (C) RT-PCR analysis of *XBP1* in *IRE1α*<sup>+/+</sup>, *IRE1α*<sup>+/ $\Delta$ Neo</sup>, *IRE1α* <sup>$\Delta$ Neo/ $\Delta$ Neo</sup>, *IRE1α*<sup>+/ $\Delta$ R</sup>, and *IRE1α* <sup>$\Delta$ R/ $\Delta$ R</sup> MEFs. +Tun and -Tun indicate treatment with and without 2  $\mu$ g/mL tunicamycin for 6 h, respectively. (D) Number of embryos obtained from mating *IRE1α*<sup>+/ $\Delta$ R</sup> mice. L, live embryos; D, dead embryos. The viability of embryos was judged from their beating heart. From these data, we confirmed the deletion of exons 20–21 in the  $\Delta R$  allele, although the  $\Delta$ Neo allele of *IRE1α* was expressed normally. We also confirmed that *IRE1α* <sup>$\Delta$ R/ $\Delta$ R</sup> mice obtained from mating *IRE1α*<sup>+/ $\Delta$ R</sup> mice lost *XBP1* splicing activity and began to die at E12.5, similarly to *IRE1α*<sup>-/-</sup> mice, whereas *IRE1α* <sup>$\Delta$ Neo/ $\Delta$ Neo</sup> mice obtained from mating *IRE1α*<sup>+/ $\Delta$ Neo</sup> mice retained *XBP1* splicing activity, and they grew and bred normally.



**Table S1. Essential fatty acid transport in *IRE1α*-deficient placentas**

| Fatty acid            | Placenta                                            |                                                     |                 | Fetus                                               |                                                     |                 |
|-----------------------|-----------------------------------------------------|-----------------------------------------------------|-----------------|-----------------------------------------------------|-----------------------------------------------------|-----------------|
|                       | <i>IRE1α</i> <sup>+/+</sup> ,<br>μg/g tissue weight | <i>IRE1α</i> <sup>-/-</sup> ,<br>μg/g tissue weight | Reduction,<br>% | <i>IRE1α</i> <sup>+/+</sup> ,<br>μg/g tissue weight | <i>IRE1α</i> <sup>-/-</sup> ,<br>μg/g tissue weight | Reduction,<br>% |
| Palmitic acid         | 2,480.0 ± 440.3                                     | 2,295.3 ± 166.5                                     | 7.4             | 1,858.4 ± 172.7                                     | 1,788.2 ± 223.6                                     | 3.8             |
| Stearic acid          | 2,547.2 ± 496.9                                     | 2,481.2 ± 194.4                                     | 2.6             | 845.0 ± 79.3                                        | 789.9 ± 70.0                                        | 6.5             |
| Linoleic acid*        | 1,290.4 ± 244.1                                     | 1,251.6 ± 92.5                                      | 3.0             | 276.2 ± 33.5                                        | 170.1 ± 17.7                                        | 38.4            |
| Arachidonic acid*     | 1,683.0 ± 256.6                                     | 1,605.3 ± 111.1                                     | 4.6             | 703.5 ± 58.7                                        | 594.8 ± 53.1                                        | 15.4            |
| Docosahexaenoic acid* | 1,039.1 ± 212.9                                     | 1,029.2 ± 63.9                                      | 1.0             | 383.0 ± 39.6                                        | 296.1 ± 19.8                                        | 22.7            |

The quantity of each fatty acid is presented as mean ± SD (n = 8).

Reduction is a value calculated by using the following formula:  $([\text{mean of } IRE1\alpha^{+/+}] - [\text{mean of } IRE1\alpha^{-/-}]) / ([\text{mean of } IRE1\alpha^{+/+}] \times 100)$ .

\*Essential fatty acid.
